Dopaminergic and opioidergic regulation of implicit hedonic facial reactions during  
anticipation and consumption of social and nonsocial rewards

Sebastian Korb<sup>1,2\*</sup>

Sebastian J. Götzendorfer<sup>2</sup>

Claudia Massaccesi<sup>3</sup>

Patrick Sezen<sup>4</sup>

Irene Graf<sup>4</sup>

Matthäus Willeit<sup>4</sup>

Christoph Eisenegger<sup>2</sup>

Giorgia Silani<sup>3\*</sup>

<sup>1</sup> Department of Psychology, University of Essex, Colchester, UK

<sup>2</sup> Department of Cognition, Emotion and Methods in Psychology, University of Vienna,  
Austria

<sup>3</sup> Department of Clinical and Health Psychology, University of Vienna, Austria

<sup>4</sup> Department of Psychiatry and Psychotherapy, Medical University of Vienna, Austria

\*Correspondence:

Sebastian Korb, Department of Psychology, University of Essex, Colchester, CO4 3SQ, UK.

Tel.: +44 (0) 1206 873591. Email: [sebastian.korb@essex.ac.uk](mailto:sebastian.korb@essex.ac.uk)

Giorgia Silani, Department of Clinical and Health Psychology, University of Vienna,

Liebiggasse 5, 1010 Vienna, Austria. Tel.: +43 1 4277 47223. Email:

[giorgia.silani@univie.ac.at](mailto:giorgia.silani@univie.ac.at)

## Abstract

The observation of animal hedonic orofacial and behavioral reactions has played a fundamental role for the identification of a dopaminergic motivational, and an opioidergic hedonic component of reward. Translation to humans remains difficult, however, as human research has struggled to adopt a similar operationalization of reward. Here, we investigated the neurochemical basis of hedonic facial and behavioral reactions to different types of rewards in healthy adult volunteers, by pharmacologically reducing dopaminergic and opioidergic receptor-specific action. Subjective ratings, physical effort, and facial reactions to matched primary social (affective touch) and nonsocial (food) rewards were assessed. Both drugs resulted in reduced physical effort and increased negative facial reactions during reward *anticipation*, but only opioidergic manipulation caused reduced positive facial reactions during reward *consumption*. This suggests that facial reactions during anticipated and experienced pleasure rely on partly different neurochemical systems, providing novel evidence in support of existing theoretical models of reward.

## Keywords

Reward; affective touch; food; dopamine; opioid; facial EMG; real effort; wanting; liking; anticipation; consumption

## 1 **Introduction**

2           Rewards are salient stimuli, objects, events, and situations that induce approach and  
3 consummatory behavior by their intrinsic relevance for survival or because experience has  
4 taught us that they are pleasurable <sup>1</sup>. Rewards can be parsed, at the psychological,  
5 neurophysiological, and neurochemical level, into the main components *wanting* (the  
6 motivation to mobilize effort to obtain a reward), *liking* (the hedonic response evoked by its  
7 consumption) <sup>2-4</sup>. This conceptual division is paralleled in cognitive theories of economic  
8 decision making <sup>5,6</sup> that similarly distinguish between *decision utility* (how much the value  
9 attached to an outcome determines its choice or pursuit), and *experienced utility* (referring to  
10 the subjective hedonic experience generated by an outcome). Today, our understanding of  
11 wanting and liking rests on 30 years of animal research, and on preliminary confirmatory  
12 findings in humans, and the parsing of rewards into its subcomponents has been shown to  
13 have important implications for affective and addictive disorders, including substance abuse  
14 and schizophrenia <sup>7,8</sup>.

15           Wanting is mainly linked to the mesolimbic dopaminergic system, and is dissociable  
16 from liking, which instead relies on the opioidergic system, as suggested for example by the  
17 “taste reactivity test”, a method to assess eating-related pleasure by observing facial and  
18 bodily reactions of animals and human infants to palatable and aversive tastes <sup>9,10</sup>. For  
19 instance, neither pharmacological disruption, nor extensive lesion of dopaminergic neurons  
20 affect facial liking reactions (e.g. relaxed facial muscles and licking of the lips) to  
21 consumption of sweet foods in rats <sup>11,12</sup>, but increased mesolimbic dopamine release induced  
22 by electric stimulation of the hypothalamus results in greater wanting to eat (e.g. food intake)  
23 without modulating liking <sup>13</sup>. On the other hand, hedonic reactions to sensory pleasure are  
24 amplified by opioidergic stimulation of various “hedonic hotspots” of the brain, including the  
25 nucleus accumbens (NAc) shell and parts of the limbic system <sup>3</sup>. In addition, the opioidergic  
26 system partly also affects wanting by modulating the effects of dopamine in the NAc <sup>14</sup>.

27 Indeed, injections of  $\mu$  and  $\delta$  opioid receptor agonists have been shown to increase food  
28 approach and feeding behavior, especially for palatable and high-energy foods <sup>15</sup>, which  
29 suggests that opioids primarily affect wanting through liking.

30 Evidence of similar neurochemical parsing of reward processing in humans is mainly  
31 derived from research in clinical populations, and a handful of recent studies in healthy  
32 volunteers. For example, stimulation of D2/D3 receptors through dopamine agonists can  
33 induce compulsive medication use, gambling, shopping, hypersexuality, and other addictive  
34 activities in some patients with Parkinson's disease <sup>16,17</sup>. These behaviors, which correspond  
35 to strong urge-like wanting without changes in subjective liking, are accompanied by altered  
36 activations in the ventral striatum and prefrontal cortex, which however normalize when  
37 patients are off dopaminergic medication. In healthy volunteers, dopamine D2/D3 receptor  
38 blockade with amisulpride disrupts the motivation to gain immediate rewards in both a  
39 pavlovian-instrumental-transfer task and a delay discounting task <sup>18</sup>, and reduces the  
40 rewarding value of prosocial decisions in women <sup>19</sup>. Administration of  $\mu$  opioid receptor  
41 agonists increases the subjective pleasantness of the most palatable food option available <sup>20</sup>,  
42 and both subjective feelings of wanting and liking of the most attractive opposite sex faces <sup>21</sup>.  
43 In contrast, the non-selective opioid receptor antagonist naloxone decreases subjective  
44 pleasure associated with viewing erotic pictures and reduces the activation of reward related  
45 brain regions such as the ventral striatum <sup>22</sup>.

46 In spite of the progress made, human and animal research on reward processing  
47 remain difficult to compare, as human research has struggled to adopt an operationalization  
48 that resembles the one used in animal research, e.g. measuring behavior and facial reactions  
49 instead of relying on subjective verbal report <sup>8,23</sup>. Indeed, while the decision utility (wanting)  
50 of a reward is easily inferred from observed choices, such as purchasing a good, or the effort  
51 mobilized to obtain it, the concomitant experienced utility (liking) is more challenging to  
52 measure objectively. In human newborns, juvenile monkeys, and adult rats the consumption

53 of food rewards elicits powerful and distinctive facial reactions<sup>9,24,25</sup>. The taste reactivity test  
54<sup>9</sup> has indeed become the gold standard to assess hedonic consummatory pleasure in animal  
55 models. Furthermore, facial reactions to rewards are not restricted to the consummatory  
56 phase, but can also be observed during the anticipation of a reward. Indeed, following  
57 Pavlovian conditioning, animals show hedonic facial reactions to cues, which they learned to  
58 associate with the delivery of an unconditioned taste stimulus<sup>26</sup>. In contrast to the facial  
59 reactions occurring during reward consumption, facial reactions to the conditioned stimuli  
60 reflect the prediction of pleasure from a future reward (i.e. anticipated pleasure)<sup>23</sup>. Whether  
61 hedonic facial reactions to anticipated or consumed rewards are neurochemically regulated in  
62 a similar way has, to our knowledge, never been investigated.

63 Hedonic facial reactions to pleasant tastes and other types of reward are more subtle in  
64 human adults, and have only started to be investigated using facial electromyography (fEMG)  
65<sup>27–31</sup>. Recently, we have shown<sup>27</sup> that the anticipation and consumption of preferred food  
66 rewards results in the relaxation of the main frowning muscle corrugator supercillii (CS), and  
67 that the experience of pleasant social touch elicits activation of the main smiling muscle, the  
68 zygomaticus major (ZM). The latter result only emerged from explorative analyses, but others  
69 have also reported ZM contraction and CS relaxation in response to pleasant social touch<sup>28–30</sup>.  
70 Extant research thus suggests that human adults relax the CS and activate the ZM during both  
71 the anticipation and the consumption of different types of pleasurable stimuli, although  
72 differences between types of rewards may also exist. How these hedonic facial reactions rely  
73 on the dopaminergic and opioidergic systems, and whether they are differently modulated  
74 depending on the type of reward announced and delivered, is currently unknown. Importantly,  
75 establishing the neurochemical basis of different aspects of reward in humans, by using  
76 translational tasks allowing better cross-species comparison, is expected to contribute to our  
77 understanding – and ultimately treatment – of reward anomalies occurring in several  
78 neuropsychiatric disorders like schizophrenia, depression, and autism<sup>8</sup>.

79 To fill this gap of knowledge, we pharmacologically manipulated the dopaminergic  
80 and opioidergic systems in adult humans and measured both explicit (subjective ratings,  
81 physical effort) and implicit (fEMG) reactions during anticipation and consumption of social  
82 and nonsocial rewards. Sweet milk with different concentrations of chocolate flavor served as  
83 nonsocial rewards. Gentle caresses to the forearm (typically referred to as “social touch” or  
84 “affective touch” in the literature), delivered by a same-sex experimenter at different speeds  
85 and resulting in different levels of pleasantness<sup>32–34</sup>, served as non-sexual social rewards.  
86 Importantly, these can both be considered to be primary rewards (i.e. a biological  
87 preparedness can be expected), and we conducted extensive prior work to select stimuli of  
88 similar magnitude across reward type<sup>27</sup>. In addition, trial-by-trial ratings during this  
89 experiment confirmed that the social and nonsocial rewards used had comparable reward  
90 magnitudes for our participants. Similarly to effort-related choice tasks used in animals<sup>35</sup> and  
91 humans<sup>36,37</sup>, participants had the choice between exerting physical effort to obtain a greater  
92 reward, and exerting less or no physical effort to obtain a smaller reward. In each trial of the  
93 experiment (Fig. 1), rewards with high or low value were announced and participants were  
94 asked to rate how much they wanted the reward, and to exert physical effort (squeezing of an  
95 individually thresholded hand-dynamometer) that was directly converted in the probability to  
96 receive the announced reward, or, alternatively, the least liked reward. The reward obtained  
97 (either the announced ‘high’ or ‘low’ reward, or the ‘verylow’ reward following insufficient  
98 effort), was subsequently delivered and its liking was measured with subjective ratings.

99 Implicit hedonic facial reactions during the anticipation of the reward as well as during  
100 and immediately after its delivery were recorded together with subjective ratings.

101 The role of the dopaminergic and opioidergic systems was investigated using oral  
102 administration three hours before the task of the highly selective D2/D3 dopamine receptor  
103 antagonist amisulpride (400 mg), the non-selective opioid receptor antagonist naltrexone (50  
104 mg), or placebo, in a randomized, double-blind, between-subject design in 131 healthy

105 volunteers (group sizes were 42, 44, and 45 respectively for amisulpride, naltrexone, and  
106 placebo). Sample sizes were chosen based on previous work employing the same compounds  
107 and doses<sup>18</sup>.

108 Adopting a translational approach and operationalizing reward processing in humans  
109 in a way that makes it comparable to animal research (e.g. measuring real effort and hedonic  
110 facial responses), we investigated two fundamental yet unresolved research questions: 1) to  
111 what extent do motivational and hedonic implicit and explicit responses to rewards rely on the  
112 dopaminergic and opioidergic systems in humans, and 2) do social (touch) and nonsocial  
113 (food) rewards share the same neurochemical basis in humans.

114 We made the following hypotheses based on the literature. First, because liking relies  
115 heavily on the opioidergic but not the dopaminergic system, subjective ratings of liking, and  
116 hedonic facial reactions during and after reward consumption, were expected to be reduced  
117 after administration of the opioid antagonist naltrexone, compared to placebo, but not after  
118 administration of the dopamine antagonist amisulpride. Second, because wanting is believed  
119 to be regulated by the dopaminergic and indirectly also by the opioidergic systems, we  
120 expected subjective ratings of wanting, and physical effort applied to obtain the announced  
121 reward, to be reduced after administration of both the D2/D3 receptor antagonist amisulpride,  
122 and naltrexone. Third, because facial responses during reward anticipation – previously  
123 shown to occur to learned cues for rewards in rats<sup>26</sup> and humans<sup>27</sup> – may reflect anticipated  
124 pleasure during a period commonly associated with wanting, they were expected to be  
125 affected by naltrexone, as well as by amisulpride, compared to placebo. Finally, based on on  
126 fEMG results showing similar facial reactions to different types of rewards<sup>27-30</sup>, and on  
127 evidence from neuroimaging studies that supports the ‘common currency hypothesis’ of  
128 reward processing<sup>3,38</sup>, we expected the same pattern of results for food and touch rewards.

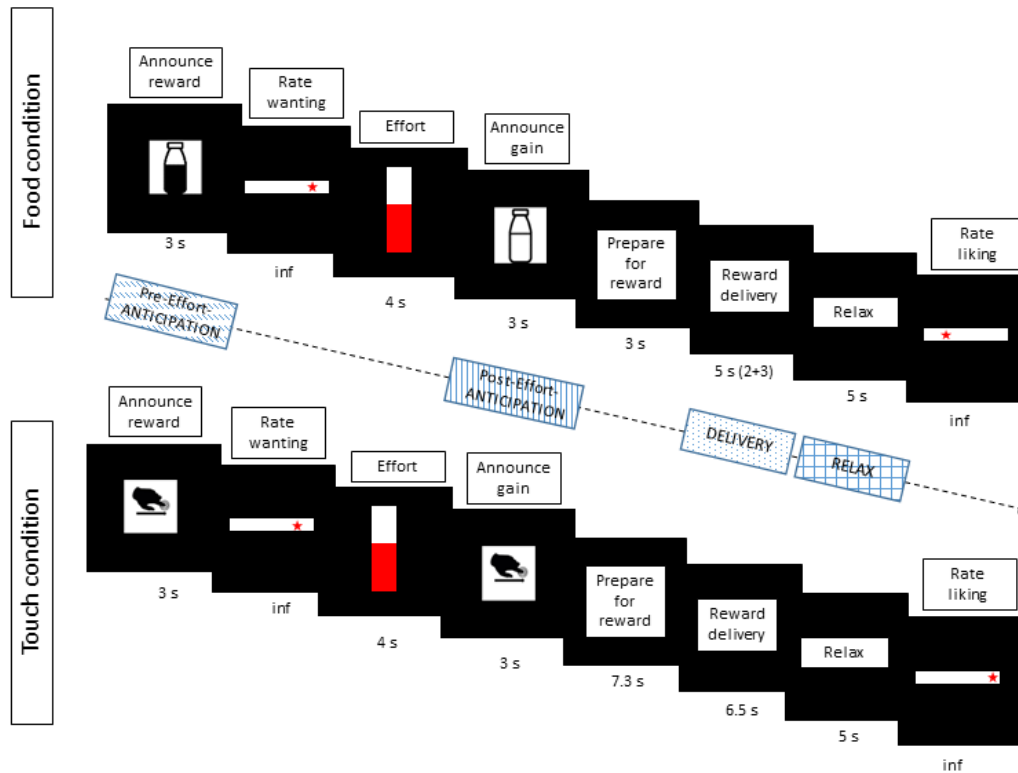

129

130 Fig. 1: Main elements in each trial for the Food and Touch conditions. Before the main task,  
 131 participants individually ranked three reward levels per condition by means of liking-ratings.  
 132 In the main task (here depicted), one of the two most liked rewards (high and low) was  
 133 announced at the beginning of each trial. The probability of obtaining the announced reward  
 134 was determined linearly by participants' hand-squeezing effort, and indicated in real-time.  
 135 The gained reward (which was either the one announced at the beginning of the trial, or the  
 136 least-liked verylow reward if squeezing was not sufficient) was then announced and delivered.  
 137 To assess reward anticipation, EMG data was analyzed during the Pre-Effort anticipation  
 138 period (3 sec) at the beginning of the trial, when a possible reward was announced, as well as  
 139 during the Post-Effort anticipation period (3 sec announcement) preceding reward delivery.  
 140 To investigate reward consumption, EMG data was analyzed during reward Delivery (5 sec in  
 141 the Food, and 6.5 sec in the Touch condition), and in the immediately following Relax phase  
 142 (5 sec). "Inf" (under ratings) symbolizes that ratings slides stayed on screen indefinitely, or  
 143 until participants' button press. For a complete representation of all trial elements see Fig. S1  
 144 in the Supporting Information.

145

## Results

### 146 Matching of drug groups

147 Given that the type of reward received in each trial depended on both the  
 148 announcement cue at the beginning (high or low) and the force exerted to obtain it (verylow  
 149 rewards were only obtained following insufficient effort), we tested for differences across  
 150 groups. The number of trials with high, low, or verylow rewards obtained did not differ across  
 151 groups, as shown by a linear mixed effects model (LMM) with number of trials as dependent



152 variable, the fixed effects Condition (social, nonsocial), Drug (amisulpride, naltrexone,  
153 placebo), and Reward Type (high, low, verylow), and by-subject random intercepts. Only a  
154 significant main effect of Reward Type was found ( $F(2, 763) = 27.84, p < .001$ ), due to a  
155 greater number of high ( $M = 16.53, SD = 2.87$ ) than low ( $M = 14.93, SD = 3.46$ ) and verylow  
156 ( $M = 8.67, SD = 4.93$ ) trials received, across all three drug groups.

157 Moreover, groups of participants did not differ (Table 1) in their average age, BMI,  
158 maximum voluntary contraction (MVC) of the hand dynamometer measured right before the  
159 main task, nor did they differ in their mood, which was measured with the Positive and  
160 Negative Affect Schedule (PANAS)<sup>39</sup> at time of pill intake (T1) and three hours later (T2)  
161 allowing us to exclude differences across groups as possible confounds of our results.

#### 162 **Explicit measures: ratings of wanting, ratings of liking and physical effort**

163 Subjective ratings of wanting and liking, as well as effort were each analyzed in  
164 separate LMMs with Condition (social, nonsocial), Drug (amisulpride, naltrexone, placebo),  
165 and Reward Type (high, low as announced at the beginning of each trial for wanting and  
166 effort; high, low, verylow as obtained after the effort phase for liking) as fixed effects, and as  
167 random effects intercepts for subjects and by-subject random slopes for the effects of  
168 Condition, Reward Type, and their interaction. Significant main and interaction effects are  
169 only reported for the factor Drug, as they are most relevant to this study. Please see the  
170 Supporting Information for exhaustive documentation of statistical results (see also Fig. S2).

171 No main or interaction effects with the factor Drug were found for ratings of wanting.  
172 Behavioral analyses on effort resulted in a significant Condition X Drug interaction (Fig. 2A,  
173  $F(1, 128.31) = 4.54, p = .01$ ) reflecting lower effort in the food condition in the amisulpride  
174 ( $M = 74.98, SD = 26.57$ ) and naltrexone ( $M = 73.51, SD = 24.43$ ) groups compared to the  
175 placebo group ( $M = 80.20, SD = 22.41$ ), while effort levels were similar across drug groups in  
176 the social condition (amisulpride:  $M = 78.34, SD = 25.14$ ; naltrexone:  $M = 73.78, SD = 23.15$ ;  
177 placebo:  $M = 76.11, SD = 23.51$ ). A marginally significant Reward Type X Drug interaction

178 (Fig.2B) was also found ( $F(1, 128.50) = 2.97, p = .05$ ), which was related to reduced effort for  
179 low rewards in the amisulpride ( $M = 71.67, SD = 27.60$ ) and naltrexone ( $M = 67.90, SD =$   
180  $24.45$ ) groups compared to the placebo group ( $M = 75.65, SD = 23.60$ ), but no such difference  
181 can be reported for the high rewards (amisulpride:  $M = 81.60, SD = 23.09$ ; naltrexone:  $M =$   
182  $79.29, SD = 21.70$ ; placebo:  $M = 80.63, SD = 22.23$ ). All other effects were not significant (all  
183  $F < 0.9$ , all  $p > .4$ ).

184 The same LMM on the ratings of liking (Fig. 2C) resulted in a significant Drug X  
185 Reward Type interaction ( $F(4, 259.62) = 11.07, p < .001$ ), reflecting greater liking of low  
186 rewards in the amisulpride group ( $M = 2.57, SD = 3.78$ ), compared to the naltrexone group ( $M$   
187  $= 1.33, SD = 4.35$ ), and the placebo group ( $M = 1.53, SD = 4.18$ ).

188 In summary, the amisulpride and naltrexone groups showed reduced effort to obtain  
189 food rewards, and to obtain low rewards of both conditions. The amisulpride group also  
190 showed greater liking of low rewards compared to both the naltrexone and placebo groups.

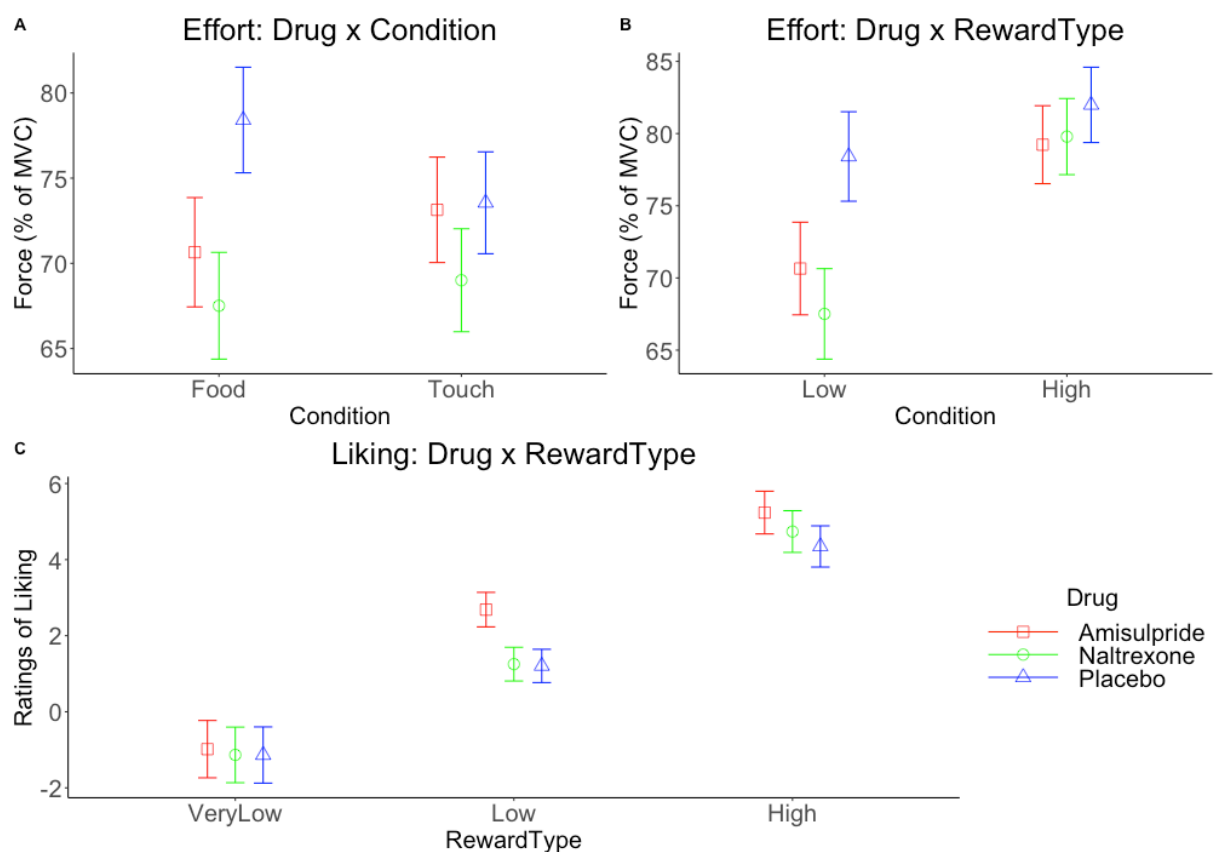

191

192 Fig. 2: Marginal means (and 95% CIs) for behavioral analyses. Physical effort was reduced in  
193 the amisulpride and naltrexone groups compared to placebo in (A) the food condition, and (B)  
194 for low rewards. (C) Liking of low rewards was greater in the amisulpride compared to the  
195 naltrexone and placebo groups.

196

### 197 **Implicit measures: facial EMG**

198 Facial EMG analyses were carried out separately for the CS and ZM muscles in four  
199 periods of interest (see Fig. 1): “Pre-effort anticipation” during reward announcement at the  
200 beginning of each trial, “Post-effort anticipation” during the announcement of the gained  
201 reward, “Delivery”, and “Relax”. The EMG of Pre- and Post-Effort anticipation periods was  
202 analyzed in relation to ratings of wanting and to effort, as these measures were taken close in  
203 time. For the same reason, EMG of the Delivery and Relax periods was analyzed in relation to  
204 ratings of liking. To better capture the link between implicit and explicit responses to rewards,  
205 and in line with our previous work <sup>27</sup>, facial EMG of each trial was analyzed in relation to  
206 subjective ratings and effort measured during the same trial, as opposed to using a-priori  
207 reward levels.

208 We first investigated if facial EMG reflected subjective ratings of wanting and/or  
209 liking and effort, independently of Drug, by regressing the EMG of each muscle (expressed as  
210 percentage of the baseline) onto the factors Condition (food, touch) and either Wanting,  
211 Liking, or Effort (capitalization to indicate that these are predictors in statistical models).  
212 Several main or interaction effects were found, showing that facial EMG was sensitive to  
213 changes in reward value, and that it was partly related to participants’ explicit measures of  
214 wanting and liking (Figure 3). Activation of the CS muscle was inversely related to Wanting  
215 ( $F(1, 138) = 8.00, p = .005$ ) and to Effort ( $F(1, 150.13) = 10.33, p = .002$ ) in the Pre-Effort  
216 anticipation period, and to Liking in the Delivery ( $F(1, 207.82) = 4.65, p = .03$ ) and Relax  
217 period ( $F(1, 136.85) = 17.03, p < .001$ ; but more so in the food condition, as reflected by a  
218 Liking X Condition interaction:  $F(1, 140.83) = 6.83, p = .009$ ). In contrast, activation of the

219 ZM muscle was positively related to Wanting in the Pre-Effort anticipation period (but only  
220 for food, as shown by a Wanting X Condition interaction:  $F(1, 7232.9) = 11.73, p < .001$ ), and  
221 in the Post-Effort anticipation period ( $F(1, 131.44) = 6.39, p = .01$ ). In the Delivery period a  
222 trend for a Liking X Condition interaction was observed again mostly for food:  $F(1, 126.70) =$   
223  $3.2, p = .07$ ).

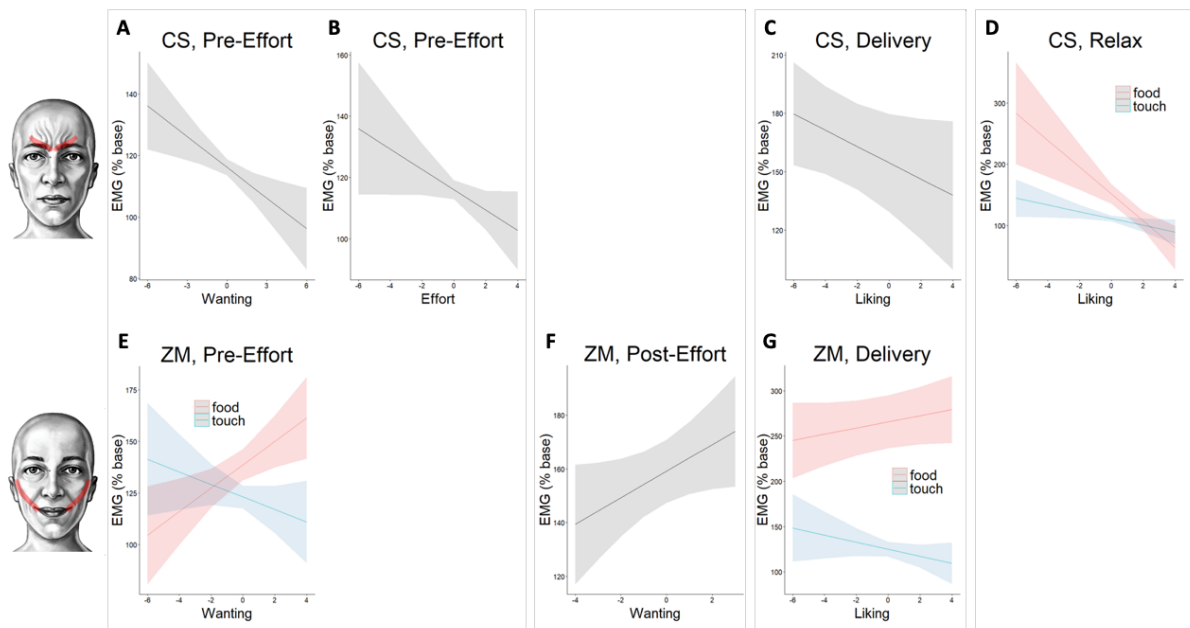

224

225 Fig. 3: Results (fit lines and 95% CIs) of analyses investigating the sensitivity of facial  
226 EMG to wanting and liking of the administered rewards, independently of drug  
227 administration. The CS muscle relaxed with greater (A) wanting and (B) effort in the Pre-  
228 Effort anticipation period, and with (C-D) greater liking in the Delivery and Relax periods.  
229 The ZM muscle activated with greater wanting in the (E) Pre- and (F) Post-Effort anticipation  
230 periods, and (G) in the Delivery period. Some of these effects were restricted to the food  
231 condition, as shown by several interactions with Condition (D, E, G).

232 Next, LMM analyses were carried out to investigate group differences in the facial  
233 EMG. These included the factors Condition (food, touch), Drug (amisulpride, naltrexone,  
234 placebo), and either Wanting or Effort for the Pre- and Post-Effort anticipation periods, or  
235 Liking for the Delivery and Relax periods. Random intercepts for subjects and by-subject  
236 random slopes for Condition and Wanting (or Effort/Liking), and their interaction, were  
237 included unless indicated otherwise. Only main and interaction effects involving the factor

238 Drug are reported, as they are the most relevant to the study's hypotheses. Please see the  
239 Supporting Information for complete statistical results.

#### 240 **Pre-Effort anticipation**

241 For the CS muscle by Wanting, a significant Drug X Condition interaction ( $F(2,$   
242  $128.70) = 4.81, p = .009$ ) reflected (Fig. 4) greater CS activation to food than touch in the  
243 amisulpride group ( $p = .005$ ; Food:  $M = 119.12, SD = 134.43$ ; Touch:  $M = 109.46, SD =$   
244  $76.09$ ) and naltrexone group ( $p < .001$ ; Food:  $M = 120.00, SD = 128.19$ ; Touch:  $M = 109.66,$   
245  $SD = 89.46$ ), while the placebo group had similar activations across both conditions ( $p = .65$ ;  
246 Food:  $M = 110.30, SD = 65.72$ ; Touch:  $M = 111.44, SD = 78.17$ ). All other effects were not  
247 significant (all  $F < 2.2$ , all  $p > .1$ ).

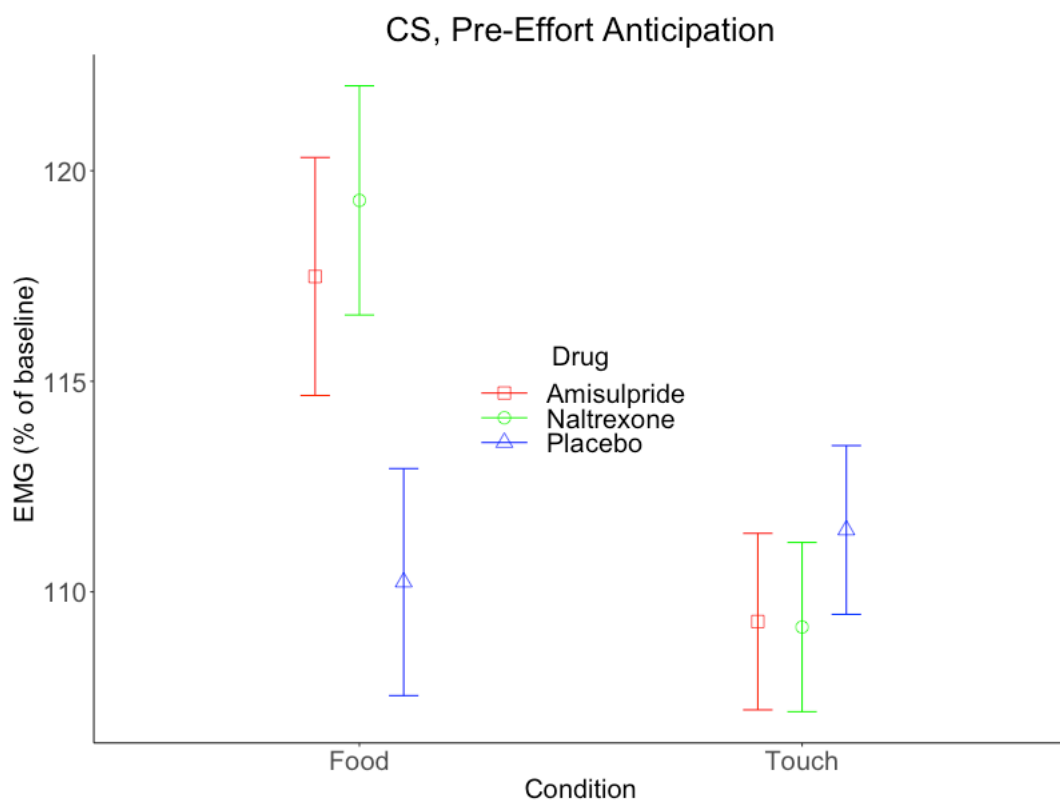

248

249 Fig. 4: Marginal means (and 95% CIs) of the EMG of the CS muscle in the Pre-Effort  
250 anticipation window. A significant Condition x Drug interaction was found for the model  
251 including the predictor Wanting (shown here), and similarly for the model including the  
252 predictor Effort.

253 Similarly, a significant Drug X Condition interaction was found in the analysis of the  
254 CS muscle by Effort ( $F(2, 135.26) = 5.09, p = .007$ ), reflecting greater CS activation to food  
255 than touch in the amisulpride ( $p = .002$ ) and naltrexone group ( $p < .001$ ), while the placebo  
256 group had similar activations across both conditions ( $p = .71$ ). For the ZM muscle by Wanting  
257 and by Effort, no significant main effects or interactions involving the factor Drug were found  
258 (all  $F < 2$ , all  $p > .1$ ).

259 In summary, activation of the CS in the Pre-Effort anticipation period was increased  
260 for food compared to touch stimuli in both active drug groups, but not in the placebo group,  
261 indicating more frowning when blocking the dopaminergic and the opioidergic systems.

### 262 **Post-Effort anticipation**

263 No significant main or interaction effects involving the factor Drug were found for the  
264 CS nor the ZM muscle (all  $F < 1.9$ , all  $p > .15$ ).

### 265 **Reward Delivery**

266 No significant main or interaction effects involving the factor Drug were found for the  
267 CS by Liking (all  $F < 7$ , all  $p > .5$ ). For the ZM, a significant Liking X Drug interaction was  
268 found ( $F(2, 128.80) = 3.97, p = .02$ ). In the placebo group (Fig. 5), the slope for ZM  
269 activation with greater liking was significantly steeper than for the naltrexone group ( $p = .01$ )  
270 indicating impaired smiling during the delivery of liked rewards only when blocking the  
271 opioidergic system. Comparisons of placebo with amisulpride, and of amisulpride with  
272 naltrexone were not significant (all  $p > .2$ ).

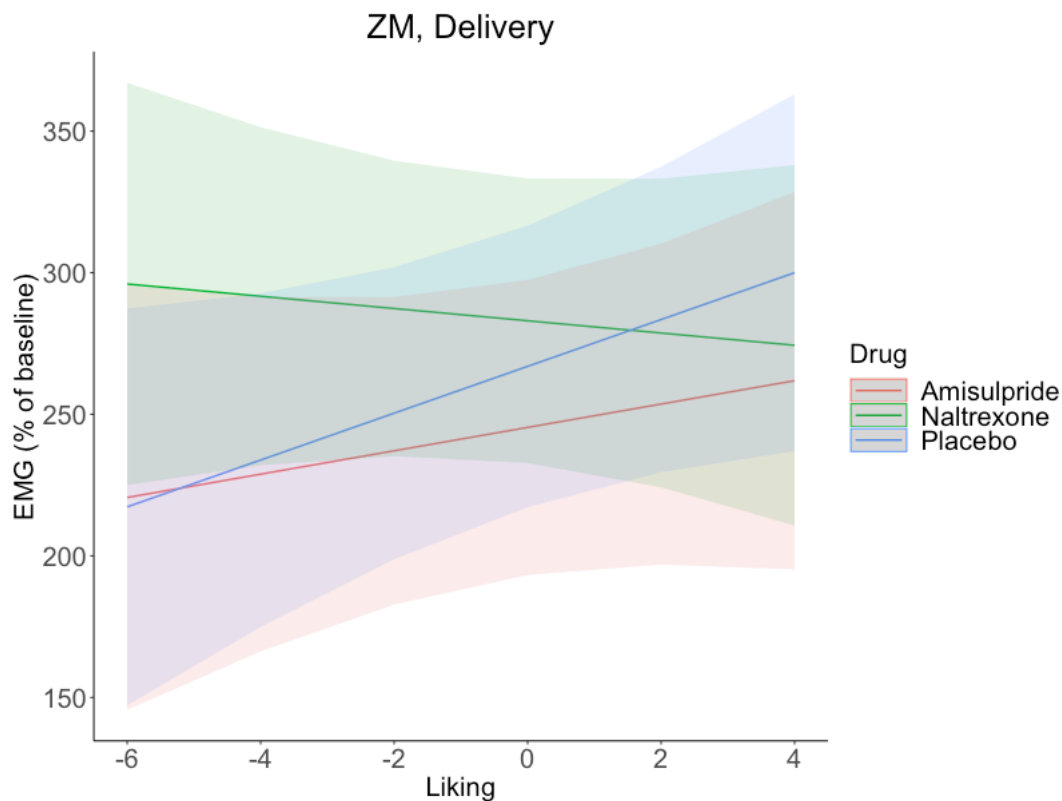

273

274 Fig. 5: Model fit (and 95% CIs) of the ZM in the Delivery window. A significant Liking x  
275 Drug interaction reflected ZM activation for greater liking in the placebo group, but not in the  
276 naltrexone group, which showed the opposite pattern of ZM relaxation for greater liking.

### 277 Relax phase

278 No significant main or interaction effects for the factor Drug were found in the CS and  
279 ZM data (all  $F < 1.7$ , all  $p > .19$ ).

### 280 Discussion

281 A recently developed experimental paradigm<sup>27</sup>, in which reward processing is  
282 operationalised similarly to animal research, by assessing in each trial both explicit (ratings  
283 and effort) and implicit (facial EMG) anticipation and consumption of social and nonsocial  
284 rewards, was combined with a dopaminergic and opioidergic drug challenge. This allowed us  
285 to address two fundamental and as of yet unresolved research questions: 1) to which extent do  
286 motivational and hedonic responses in adult humans rely on shared or separate neurochemical  
287 systems, and 2) does the neurochemical basis of human reward processing differ for social  
288 and nonsocial rewards.

289 Analyses of the explicit measures ratings and effort revealed that participants who had  
290 taken either the D2/D3 dopamine receptor antagonist amisulpride, or the non-selective opioid  
291 receptor antagonist naltrexone, produced less effort compared to placebo to 1) obtain food  
292 rewards (Fig. 2A), and 2) to obtain low rewards of both conditions (Fig. 2B). These findings  
293 are in line with animal models indicating that both the dopaminergic and the opioidergic  
294 systems underlie the motivational aspect of reward processing<sup>14</sup>. The fact that the effect was  
295 observed for the second-preferred (low) reward, but not for the most preferred (high) reward,  
296 rules out the possibility of a generic motor impairment (e.g. induced by dopaminergic  
297 blockage). Instead, the results speak for a genuine alteration of the incentive salience of the  
298 low reward, whose rewarding value approached that of the verylow reward, due to the  
299 pharmacological manipulation.

300 Interestingly, despite both drugs having an effect on the effort produced to obtain the  
301 low rewards, the amisulpride group also showed increased ratings of liking compared to the  
302 naltrexone group (Fig. 2C). This seems to corroborate the hypothesis that the dopaminergic  
303 system underlies the motivational but not the hedonic component of rewards, while the  
304 opioidergic system underlies both. However, these findings should be interpreted with  
305 caution, since liking of low rewards was also lower in the placebo compared to the  
306 amisulpride group.

307 To verify whether implicit facial reactions reflected the hedonic value of rewards,  
308 fEMG data was analyzed in a first step without the factor Drug. The findings confirmed the  
309 pattern expected based on prior work<sup>27,28,30,40,41</sup>, of less frowning and more smiling during  
310 anticipation and consumption of most wanted and most liked rewards (Fig. 3). As we have  
311 recently reported using the same paradigm<sup>27</sup>, most effects were in the CS muscle, which  
312 relaxed for greater wanting and effort in the Pre-Effort anticipation period, and for greater  
313 liking in the Delivery and Relax periods (the latter effect was stronger in the food condition).  
314 The ZM muscle showed the opposite pattern of activation for greater wanting in the Pre and



315 Post-Effort anticipation periods, and for greater liking in the Delivery period (the first and last  
316 effect were only present in the food condition). The sensitivity of fEMG for capturing wanting  
317 and liking was thus confirmed, although the drug-independent effects were, as previously  
318 reported<sup>27</sup>, more prominent for the CS than the ZM muscle.

319 In a second next step, we assessed the impact of the drugs on fEMG activity. In line  
320 with our initial hypothesis, only the opioidergic antagonist had an effect on implicit hedonic  
321 facial reactions during reward *consumption*. In particular, an increased ZM activation for  
322 greater liking was found in the placebo group during Delivery, and the slope of this effect was  
323 significantly different in the placebo than in the naltrexone group, which instead showed the  
324 opposite pattern of ZM relaxation with greater liking (Fig. 5). The fact that administration of  
325 the opioid antagonist naltrexone impaired smiling during the delivery of liked rewards  
326 parallels animal observation of reduced orofacial hedonic reactions to sweet food after  
327 opioidergic blockage<sup>42</sup>. Importantly, this finding cannot be explained by mouth movements  
328 that might have occurred during food delivery (although instruction to swallow followed the  
329 Delivery window), as statistics did not reveal an interaction with the factor Condition.

330 Confirming our hypothesis about implicit hedonic facial reactions during the  
331 *announcement* of a reward, both amisulpride and naltrexone resulted in greater CS activation  
332 during the Pre-Effort anticipation of food (Fig. 4). Because frowning typically reflects a more  
333 negative (or less positive) reaction<sup>43,44</sup>, the fact that dopamine and opioid antagonists led to  
334 greater frowning during reward anticipation might be interpreted as a reflection of less  
335 anticipated pleasure in these groups of participants.

336 Taken together, fEMG data showed a differential action of dopaminergic and  
337 opioidergic drug manipulation during the anticipation and consumption of rewards. In line  
338 with the explicit measures (ratings of wanting, ratings of liking and effort), the implicit  
339 measure fEMG indicates an effect of both amisulpride and naltrexone during the anticipation  
340 of rewards, but only of naltrexone during subsequent reward consumption. This pattern of

341 results confirms and extends to human adults previous animal evidence about the role of the  
342 dopaminergic system for the motivational component and of the opioidergic system for both  
343 motivational and hedonic components of reward processing. This is the first evidence  
344 suggesting that the neurochemical regulation of pleasure (as indicated by hedonic facial  
345 reactions) is phase-specific, depending on whether the reward is anticipated or experienced.

346 Inclusion of both social (touch) and nonsocial (food) rewards allowed us to address the  
347 still unresolved question<sup>38</sup>, whether different types of rewards are processed in the same  
348 neural structures (as proposed by the ‘common currency hypothesis’), or if representations  
349 coding for different rewards occur in distinct neural structures, albeit on a common scale<sup>45</sup>.  
350 Social rewards in particular may constitute a separate class of stimuli, with a dedicated neural  
351 circuitry<sup>46</sup>, which can be specifically impaired, for example in people with autism spectrum  
352 disorders<sup>47,48</sup>. Although the magnitude of the two types of rewards was carefully matched<sup>27</sup>,  
353 we found that most drug effects were either stronger or restricted to food trials, e.g. in the Pre-  
354 Effort anticipation period. This suggests that wanting and liking of both social and nonsocial  
355 rewards may not rely on exactly the same neurochemical brain mechanisms. However, fEMG  
356 results to food were also stronger to begin with, which might explain why only this condition  
357 showed drug-induced effects. Another possible explanation for the less pronounced drug  
358 effects in the touch condition is that responses to social rewards, including touch, might also  
359 depend on oxytocin and serotonin, in addition to dopamine and opioids<sup>49,50</sup>. Future studies  
360 should investigate the role of further neurochemical systems in the processing of social vs.  
361 nonsocial rewards. Ultimately, a clear answer to the question if different rewards are  
362 processed in the same or different brain areas may require the use of brain imaging, or of  
363 more direct measures of brain activity, in addition to pharmacological challenges tailored to  
364 investigate the role of different neurochemical systems in the processing of social vs.  
365 nonsocial rewards.

366

## Conclusion

367 We report pharmacological evidence in healthy human volunteers, across several  
368 measures including the monitoring of facial expressions with fEMG, for the hypothesis that  
369 *liking* of rewards relies only on the opioidergic system, and *wanting* of rewards relies on both  
370 the dopaminergic and opioidergic system. Interestingly, administration of both dopaminergic  
371 and opioidergic antagonists was accompanied by increased negative facial expressions during  
372 reward anticipation - suggesting that important neurochemical differences underlie hedonic  
373 expressions occurring during anticipation and experience of pleasure. This constitutes the first  
374 demonstration of this kind in adult humans, using an operationalization of reward closely  
375 resembling previous animal research. The finding that most drug effects were either stronger  
376 for or restricted to food trials potentially points to different neurochemical brain mechanisms  
377 for social and nonsocial rewards.

378

379

## Materials and Methods

### 380 Subjects

381 Based on previous work that had used the same compounds and doses<sup>18</sup>, we aimed at  
382 collecting data from 40 participants per group or more. The final participants sample included  
383 131 volunteers (88 females) aged 18–35 years ( $M = 23.3$ ;  $SD = 3.5$ ). In the amisulpride group  
384 blood concentrations of the drug (measured five hours after intake) were in or above the  
385 therapeutic range (blood samples missing for six people). Specifically, the minimum was 212  
386 ng/ml, and 19 participants were above 604 ng/ml. All participants reported being right-  
387 handed, to smoke less than five cigarettes daily, to have no history of current or former drug  
388 abuse, to like milk and chocolate, not to suffer from diabetes, lactose intolerance, lesions or  
389 skin disease on the left forearm, and to be free of psychiatric or neurological disorders.  
390 Participants' average Body Mass Index (BMI) was 22.6, ( $SD = 2.5$ , range 17.7 – 29.3). To  
391 reduce the chances that social touch would be perceived as a sexual reward, the social touch

392 stimulation was always carried out by a same-sex experimenter (see Procedure), and only  
 393 participants who reported to be heterosexual were included. The study was approved by the  
 394 Ethical Committee of the Medical University of Vienna (EK N. 1393/2017) and was  
 395 performed in line with the Declaration of Helsinki <sup>51</sup>. Participants signed informed consent  
 396 and received a monetary compensation of 90€.

|                     | <b>Amisulpride</b> | <b>Naltrexone</b> | <b>Placebo</b> | Group differences     |
|---------------------|--------------------|-------------------|----------------|-----------------------|
| N (Male, Female)    | 42 (14, 28)        | 44 (14, 30)       | 45 (15, 30)    |                       |
| Age M (SD)          | 23.7 (4.1)         | 22.9 (2.8)        | 23.1 (3.7)     | $t = -0.73, p = 0.46$ |
| BMI M (SD)          | 22.7 (2.5)         | 23.0 (2.3)        | 22.2 (2.5)     | $t = -0.99, p = 0.32$ |
| MVC M (SD)          | 211.9 (86.3)       | 208.7 (81.8)      | 215.3 (73.1)   | $t = 0.19, p = 0.85$  |
| PANAS pos T1 M (SD) | 30.5 (5.4)         | 29.7 (7.3)        | 29.4 (6.7)     | $t = -0.8, p = 0.42$  |
| PANAS neg T1 M (SD) | 12.1 (3.2)         | 14.3 (7.5)        | 11.5 (2.1)     | $t = -0.7, p = 0.52$  |
| PANAS pos T2 M (SD) | 27.1 (6.3)         | 24.7 (8.0)        | 26.7 (7.4)     | $t = -0.3, p = 0.80$  |
| PANAS neg T2 M (SD) | 10.1 (2.8)         | 12.1 (5.5)        | 10.5 (0.9)     | $t = -0.5, p = 0.58$  |

397 Table 1: participant characteristics. BMI = Body Mass Index; MVC = Maximum Voluntary  
 398 Contraction; PANAS = Positive and Negative Affective Schedule; M = Mean

### 399 **Stimuli**

400 Three stimuli with identical fat and sugar content (1.5 g fat, 10 g of sugar per 100 g)  
 401 were used as rewards in the Nonsocial condition: milk, chocolate milk, and a 4:1 mix of milk  
 402 and chocolate milk. Tap water served for rinsing at the end of each trial. The initial stimulus  
 403 temperature of these liquids was kept constant ( $\sim 4^\circ$  C) across participants. Stimulus delivery  
 404 was accomplished through computer-controlled pumps (PHD Ultra pumps, Harvard  
 405 Apparatus) attached to plastic tubes (internal  $\varnothing$  1,6 mm; external  $\varnothing$  3,2 mm; Tygon tubing,  
 406 U.S. Plastic Corp.), which ended jointly on an adjustable mount positioned about two  
 407 centimeters in front of the participant's mouth. In each trial, two ml of liquid were  
 408 administered during two seconds. Overall, including stimulus pretesting (see Procedure),  
 409 participants consumed 196 ml of liquids, composed of 98 ml of water, and 98 ml of sweet  
 410 milk with different concentrations of chocolate aroma (depending on effort, see below).

411 Social rewards consisted of gentle caresses over a previously-marked nine-cm area of  
412 the participant's forearm (measurement started from the wrist towards the elbow). Three  
413 different caressing frequencies, chosen based on the literature and pilot testing, were applied  
414 during six seconds by a same-sex experimenter: six cm/s, 21 cm/s and 27 cm/s. To facilitate  
415 stroking, the stimulating experimenter received extensive training and in each trial heard  
416 rhythmic sounds, indicating the rhythm for stimulation, through headphones.

#### 417 **EMG**

418 After cleansing of the corresponding face areas with alcohol, water, and an abrasive  
419 paste, reusable Ag/AgCl electrodes with 4 mm inner and 8 mm outer diameter were attached  
420 bipolarly according to guidelines<sup>52</sup> on the left corrugator supercillii (CS) and the zygomaticus  
421 major (ZM) muscles. A ground electrode was attached to the participants' forehead, and a  
422 reference electrode on the left mastoid. EMG data was sampled at 1200 Hz with impedances  
423 below 20 kOHM using a g.USBamp amplifier (g.tec Medical Engineering GmbH) and the  
424 software Matlab (MathWorks, Inc.).

#### 425 **Procedure**

426 A monocentric, randomized, double-blind, placebo-controlled, three-armed study  
427 design was used. The study took place in the Department of Psychiatry and Psychotherapy at  
428 the Medical University of Vienna. Participants visited the laboratory for a first visit (T0) in  
429 which they received a health screening, followed by a second visit (T1) that included oral  
430 drug intake and the experiment described here. Pharmacological dosage, and length of waiting  
431 time after drug intake (three hours) were modeled on previous work<sup>18</sup>.

432 Participants came to T1 with an empty stomach (they were instructed not to eat in the  
433 preceding six hours), filled out the PANAS questionnaire, tested negative on a urine drug  
434 screen sensitive to opiates, amphetamine, methamphetamine, cocaine (among other things),  
435 and then received a capsule filled with either 400 mg of amisulpride (Solian®), 50 mg of  
436 naltrexone (Dependex®), or 650 mg of mannitol (sugar) from the study doctor. All capsules

437 looked identical from the outside, and neither participants nor the experimenters were  
438 informed of their content. Drug intake was followed by a waiting period, EMG preparation,  
439 and task instructions.

440 The experiment comprised two tasks following procedures described elsewhere<sup>27</sup>. The  
441 main task started three hours after pill intake. Participants were seated at a table and  
442 comfortably rested their left forearm on a pillow. A curtain blocked their view of the left  
443 forearm and the rest of the room. This was particularly relevant for the social condition, in  
444 which one of two same-sex experimenters applied the social rewards to the participant's left  
445 forearm. Two experimenters were always present during testing, to limit the influence of  
446 participants' experimenter preferences, and to allow participants to better concentrate on the  
447 (social) stimuli.

448 Participants first completed a short task in which they experienced and individually  
449 ranked three reward levels with liking-ratings for the social and nonsocial condition and the  
450 respective stimuli, presented randomly in sets of three of the same condition. In the main task,  
451 which started three hours after pill intake, the previously most liked stimuli were used as  
452 'high' rewards, the stimuli with medium liking as 'low' rewards, and the least liked stimuli  
453 were used as 'very low' rewards. To calibrate the dynamometer, the maximum voluntary  
454 contraction (MVC) was established right before the short task, by asking participants to  
455 squeeze the dynamometer (HD-BTA, Vernier Software & Technology, USA) with their right  
456 hand as hard as possible three times during three seconds. The average MVC (peak force in  
457 newtons across all three trials) was 212 ( $SD = 80.4$ ), and did not differ between Drug groups,  
458 as tested by linear regression ( $\beta = 1.6$ ,  $SE = 8.68$ ,  $t = 0.19$ ,  $p = 0.85$ ).

459 After calibration of the dynamometer, EMG electrodes were attached, participants  
460 received detailed instructions, and completed four practice trials (two per condition). The  
461 main task included four experimental blocks with 20 trials each. Each block contained  
462 either food or touch trials, and the blocks were interleaved (ABAB or BABA) in a

463 counterbalanced order across participants. Each trial included (Fig. 1) the following main  
464 steps (see Supporting Information for all elements of a trial): 1) a picture announcing the  
465 highest possible reward (high or low, 3 sec), 2) a continuous scale ranging from ‘not at all’ to  
466 ‘very much’ to rate (without a time limit) wanting of the announced reward (ratings were  
467 converted to a Likert scale ranging from -10 to +10), 3) a 4-sec period of physical effort,  
468 during which probability of receiving the announced reward was determined by the amount of  
469 force exerted by squeezing the dynamometer with the right hand, while receiving visual  
470 feedback (sliding average of 1 sec, as percentage of the MVC), 4) a picture announcing the  
471 obtained reward (3 sec in the nonsocial, 7.3 sec in the social condition), which could be high,  
472 low, or – if insufficient effort had been exerted – verylow (the greater participants’ effort, the  
473 higher the probability of obtaining the announced reward), 5) a phase of reward delivery (2  
474 sec in the food, 6.5 sec in the touch condition – this difference in timing was necessary to  
475 obtain sufficiently long tactile stimulation, while keeping the overall trial duration similar  
476 across conditions), 6) in the food condition instructions to lean back and swallow the obtained  
477 reward (duration 3 sec), 7) a relaxation phase (5 sec), and 8) a continuous scale to rate the  
478 liking of the obtained reward. In the food condition, participants then received water for  
479 mouth rinsing. In both conditions trials ended with a blank screen for 3 to 4 seconds. The last  
480 four trials in each block did not require pressing of the dynamometer – these trials were kept  
481 in the data, as removing them from analyses did not change the pattern of results. After each  
482 block participants were allowed to take a short break.

483 Both tasks were run on a desktop computer with Windows 7 using MATLAB 2014b  
484 and the Cogent 2000 and Cogent Graphics toolboxes, and presented on an LCD monitor with  
485 a resolution of 1280 x 1024 pixels. The Positive and Negative Affect Schedule (PANAS)<sup>39</sup>  
486 was filled out twice at the main laboratory visit: just before pill intake, and 3 hours later.  
487 Levels of amisulpride (ng/ml) were measured in blood samples taken five hours after pill  
488 intake (after both tasks).

## 489 **Analyses**

490 Data were analyzed with linear mixed effects models (LMMs) using the `lmer()`  
491 function of the *lme4* package in R<sup>53,54</sup> (with exception of group comparisons for age, BMI,  
492 MVC, and PANAS scores, and number of excluded trials, which were made with linear  
493 regressions using the `lm()` function). In comparison to ANOVAs, LMMs reduce Type-I errors  
494 and allow for the generalization of findings<sup>55</sup>. All the data and analysis scripts are available  
495 online (<https://bit.ly/35UtUvw>). Figures (except Fig. 1) were created in R using the packages  
496 *ggplot2*, *ggpirate*, and *cowplot*.

497 Behavioral data were analyzed in the following manner. Outlier trials were defined as  
498 those with a rating of wanting, rating of liking, or amount of exerted force, which was  
499 greater/smaller than the subject's mean  $\pm$  2 times the subject's standard deviation. This led  
500 to an average rejection of 6.56 trials per participant ( $SD = 3.71$ ). The number of excluded  
501 trials did not differ between groups, as tested by linear model ( $F(2, 128) = 2.54, p = 0.08$ ). For  
502 each behavioral dependent variable (ratings of wanting and liking, effort), a LMM was run  
503 with the fixed effects Condition (food, touch), RewardType (high, low, verylow), and Drug  
504 (amisulpride, naltrexone, placebo). Categorical predictors were centered through effect  
505 coding, and by-subject random intercepts and slopes for all within-subjects factors and their  
506 interactions were included as random effects (unless the model did not converge, in which  
507 case first the interaction among within-subjects factors and then the slopes by Condition were  
508 dropped). Type-III F-tests were computed with the Satterthwaite degrees of freedom  
509 approximation, using the `anova()` function of the *lmerTest* package.

510 Due to technical failure, one participant lacked EMG data entirely, and another  
511 participant lacked EMG for half of the trials. EMG data were preprocessed in Matlab R2018a  
512 ([www.themathworks.com](http://www.themathworks.com)), partly using the EEGLAB toolbox<sup>56</sup>. A 20 to 400 Hz bandpass  
513 filter was applied, then data were rectified and smoothed with a 40 Hz low-pass filter. Epochs  
514 were extracted focusing on periods of reward anticipation (Pre-Effort and Post-Effort



515 anticipation) and reward consumption (Delivery and subsequent Relax). EMG was averaged  
516 over time-windows of one second, with exception of the 6.5-seconds-long period of touch  
517 Delivery, which was averaged over five windows of 1.3 seconds each, to obtain the same  
518 number of windows as for the food condition. We excluded for each participant trials on  
519 which the average amplitude in the baseline period (one second during fixation) of the CS or  
520 ZM muscles was lower than  $M-2*SD$ , or higher than  $M+2*SD$  ( $M$  = average amplitude over  
521 all trials' baselines for the respective muscle and participant). On average, this led to the  
522 rejection of 7.7 % of trials per participant ( $SD = 2.5$ ). EMG analyses were carried out in four  
523 periods of interest: *Pre-effort anticipation* during reward announcement at the beginning of  
524 each trial (3 sec), *Post-effort anticipation* during the announcement of the gained reward (3  
525 sec), *Delivery* (5 sec in the Food and 6.5 sec in the Touch condition, both averaged to five 1-  
526 sec time windows), and *Relax* (5 sec). For each trial, values in these epochs were expressed as  
527 percentage of the average amplitude during the fixation cross at the beginning of that trial. For  
528 the Pre- and Post-Effort anticipation periods, separate linear mixed-effects models (LMM)  
529 were fitted by muscle, with the fixed effects Drug (amisulpride, naltrexone, placebo),  
530 Condition (food, touch), and either trial-by-trial Wanting, or Effort (continuous predictors).  
531 During the Post-Effort anticipation period participants could receive the information that they  
532 were going to obtain the verylow reward, to which the preceding ratings of wanting and effort  
533 did not apply. Therefore, verylow trials were excluded from analyses of the Post-Effort  
534 anticipation period by Wanting and Reward. For the Delivery and Relax periods, separate  
535 LMMs on all trials were fitted by muscle, with the fixed effects Drug, Condition, and Liking.  
536 In all LMMs Wanting, Effort, and Liking were centered and scaled by subject.

### 537 **Acknowledgments**

538 The study was supported by the Vienna Science and Technology Fund (WWTF) with  
539 a grant (CS15-003) awarded to Giorgia Silani and Christoph Eisenegger, and a grant  
540 (VRG13-007) awarded to Christoph Eisenegger. Funders had no role in study design, data

541 collection and analysis, decision to publish or preparation of the manuscript. We thank Prof.  
542 Boris Quednow for commenting on an earlier version of the manuscript. Many thanks to  
543 Mumna Al Banchaabouchi and the interns and master students whose help was crucial for  
544 data acquisition: Mani Erfanian Abdoust, Anne Franziska Braun, Raimund Bühler, Lena  
545 Drost, Manuel Czornik, Lisa Hollerith, Berit Hansen, Luise Huybrechts, Merit Pruin, Vera  
546 Ritter, Conrad Seewald, Frederic Schwetz, Carolin Waleew, Luca Wiltgen, Stephan Zillmer.

#### 547 **Author contributions**

548 S.K., G.S., C.E conception and design of the work. S.G. supervised data collection.  
549 P.S., I.G., and M.W. were responsible for all medical aspects and for drug delivery. S.K.  
550 performed data processing and analysis, to which G.S. and C.M. provided valuable input. S.K.  
551 and G.S. wrote the manuscript, with input from all co-authors.

#### 552 **References**

- 553 1. Schultz, W. Reward. in *Brain Mapping: An Encyclopedic Reference* (ed. Toga, A. W.) vol. 2 643–  
554 651 (Academic Press: Elsevier, 2015).
- 555 2. Berridge, K. C. Food reward: brain substrates of wanting and liking. *Neurosci. Biobehav. Rev.* **20**,  
556 1–25 (1996).
- 557 3. Berridge, K. C. & Kringelbach, M. L. Pleasure systems in the brain. *Neuron* **86**, 646–664 (2015).
- 558 4. Berridge, K. C. & Robinson, T. E. What is the role of dopamine in reward: hedonic impact, reward  
559 learning, or incentive salience? *Brain Res. Brain Res. Rev.* **28**, 309–369 (1998).
- 560 5. Kahneman, D., Wakker, P. P. & Sarin, R. Back to Bentham? Explorations of Experienced Utility. *Q.*  
561 *J. Econ.* **112**, 375–406 (1997).
- 562 6. Berridge, K. C. & O’Doherty, J. P. From Experienced Utility to Decision Utility. in *Neuroeconomics*  
563 *(Second Edition)* (eds. Glimcher, P. W. & Fehr, E.) 335–351 (Academic Press, 2014).  
564 doi:10.1016/B978-0-12-416008-8.00018-8.
- 565 7. Berridge, K. C. Evolving Concepts of Emotion and Motivation. *Front. Psychol.* **9**, (2018).

- 566 8. Der-Avakian, A., Barnes, S. A., Markou, A. & Pizzagalli, D. A. Translational Assessment of Reward  
567 and Motivational Deficits in Psychiatric Disorders. *Curr. Top. Behav. Neurosci.* **28**, 231–262  
568 (2016).
- 569 9. Grill, H. J. & Norgren, R. The taste reactivity test. I. Mimetic responses to gustatory stimuli in  
570 neurologically normal rats. *Brain Res.* **143**, 263–279 (1978).
- 571 10. Barbano, M. F. & Cador, M. Opioids for hedonic experience and dopamine to get ready for it.  
572 *Psychopharmacology (Berl.)* **191**, 497–506 (2007).
- 573 11. Berridge, K. C., Venier, I. L. & Robinson, T. E. Taste reactivity analysis of 6-hydroxydopamine-  
574 induced aphagia: implications for arousal and anhedonia hypotheses of dopamine function.  
575 *Behav. Neurosci.* **103**, 36–45 (1989).
- 576 12. Treit, D. & Berridge, K. C. A comparison of benzodiazepine, serotonin, and dopamine agents in  
577 the taste-reactivity paradigm. *Pharmacol. Biochem. Behav.* **37**, 451–456 (1990).
- 578 13. Berridge, K. C. & Valenstein, E. S. What psychological process mediates feeding evoked by  
579 electrical stimulation of the lateral hypothalamus? *Behav. Neurosci.* **105**, 3–14 (1991).
- 580 14. Peciña, S. & Smith, K. S. Hedonic and motivational roles of opioids in food reward: implications  
581 for overeating disorders. *Pharmacol. Biochem. Behav.* **97**, 34–46 (2010).
- 582 15. Taha, S. A. Preference or fat? Revisiting opioid effects on food intake. *Physiol. Behav.* **100**, 429–  
583 437 (2010).
- 584 16. Callesen, M. B., Scheel-Krüger, J., Kringelbach, M. L. & Møller, A. A systematic review of impulse  
585 control disorders in Parkinson’s disease. *J. Park. Dis.* **3**, 105–138 (2013).
- 586 17. Evans, A. H. *et al.* Compulsive drug use linked to sensitized ventral striatal dopamine  
587 transmission. *Ann. Neurol.* **59**, 852–858 (2006).
- 588 18. Weber, S. C. *et al.* Dopamine D2/3- and  $\mu$ -opioid receptor antagonists reduce cue-induced  
589 responding and reward impulsivity in humans. *Transl. Psychiatry* **6**, e850 (2016).
- 590 19. Soutschek, A. *et al.* The dopaminergic reward system underpins gender differences in social  
591 preferences. *Nat. Hum. Behav.* **1** (2017) doi:10.1038/s41562-017-0226-y.

- 592 20. Eikemo, M. *et al.* Sweet taste pleasantness is modulated by morphine and naltrexone.  
593 *Psychopharmacology (Berl.)* **233**, 3711–3723 (2016).
- 594 21. Chelnokova, O. *et al.* Rewards of beauty: the opioid system mediates social motivation in  
595 humans. *Mol. Psychiatry* **19**, 746–747 (2014).
- 596 22. Büchel, C., Miedl, S. & Sprenger, C. Hedonic processing in humans is mediated by an opioidergic  
597 mechanism in a mesocorticolimbic system. *eLife* **7**, e39648 (2018).
- 598 23. Pool, E., Sennwald, V., Delplanque, S., Brosch, T. & Sander, D. Measuring wanting and liking from  
599 animals to humans: A systematic review. *Neurosci. Biobehav. Rev.* **63**, 124–142 (2016).
- 600 24. Berridge, K. C. Measuring hedonic impact in animals and infants: microstructure of affective taste  
601 reactivity patterns. *Neurosci. Biobehav. Rev.* **24**, 173–198 (2000).
- 602 25. Steiner, J. E., Glaser, D., Hawilo, M. E. & Berridge, K. C. Comparative expression of hedonic  
603 impact: affective reactions to taste by human infants and other primates. *Neurosci. Biobehav.*  
604 *Rev.* **25**, 53–74 (2001).
- 605 26. Delamater, A. R., LoLordo, V. M. & Berridge, K. C. Control of fluid palatability by exteroceptive  
606 Pavlovian signals. *J. Exp. Psychol. Anim. Behav. Process.* **12**, 143–152 (1986).
- 607 27. Korb, S. *et al.* Facial responses of adult humans during the anticipation and consumption of touch  
608 and food rewards. *Cognition* **194**, 104044 (2020).
- 609 28. Mayo, L. M., Lindé, J., Olausson, H., Heilig, M. & Morrison, I. Putting a good face on touch: Facial  
610 expression reflects the affective valence of caress-like touch across modalities. *Biol. Psychol.* **137**,  
611 83–90 (2018).
- 612 29. Pawling, R., Cannon, P. R., McGlone, F. P. & Walker, S. C. C-tactile afferent stimulating touch  
613 carries a positive affective value. *PloS One* **12**, e0173457 (2017).
- 614 30. Ree, A., Mayo, L. M., Leknes, S. & Sailer, U. Touch targeting C-tactile afferent fibers has a unique  
615 physiological pattern: A combined electrodermal and facial electromyography study. *Biol.*  
616 *Psychol.* **140**, 55–63 (2019).

- 617 31. Franzen, J. & Brinkmann, K. Wanting and liking in dysphoria: Cardiovascular and facial EMG  
618 responses during incentive processing. *Biol. Psychol.* **121**, 19–29 (2016).
- 619 32. Löken, L. S., Wessberg, J., Morrison, I., McGlone, F. & Olausson, H. Coding of pleasant touch by  
620 unmyelinated afferents in humans. *Nat. Neurosci.* **12**, 547–548 (2009).
- 621 33. McGlone, F., Wessberg, J. & Olausson, H. Discriminative and Affective Touch: Sensing and  
622 Feeling. *Neuron* **82**, 737–755 (2014).
- 623 34. Ackerley, R., Saar, K., McGlone, F. & Backlund Wasling, H. Quantifying the sensory and emotional  
624 perception of touch: differences between glabrous and hairy skin. *Front. Behav. Neurosci.* **8**, 34  
625 (2014).
- 626 35. Salamone, J. D. *et al.* Haloperidol and nucleus accumbens dopamine depletion suppress lever  
627 pressing for food but increase free food consumption in a novel food choice procedure.  
628 *Psychopharmacology (Berl.)* **104**, 515–521 (1991).
- 629 36. Lopez-Persem, A., Rigoux, L., Bourgeois-Gironde, S., Daunizeau, J. & Pessiglione, M. Choose, rate  
630 or squeeze: Comparison of economic value functions elicited by different behavioral tasks. *PLoS*  
631 *Comput. Biol.* **13**, e1005848 (2017).
- 632 37. Treadway, M. T., Buckholz, J. W., Schwartzman, A. N., Lambert, W. E. & Zald, D. H. Worth the  
633 ‘EEfRT’? The Effort Expenditure for Rewards Task as an Objective Measure of Motivation and  
634 Anhedonia. *PLOS ONE* **4**, e6598 (2009).
- 635 38. Ruff, C. C. & Fehr, E. The neurobiology of rewards and values in social decision making. *Nat. Rev.*  
636 *Neurosci.* **15**, 549–562 (2014).
- 637 39. Watson, D., Clark, L. A. & Tellegen, A. Development and validation of brief measures of positive  
638 and negative affect: the PANAS scales. *J Soc Psychol* **54**, 1063–70 (1988).
- 639 40. Gilbert, A. N., Fridlund, A. J. & Sabini, J. Hedonic and social determinants of facial displays to  
640 odors. *Chem. Senses* **12**, 355–363 (1987).
- 641 41. Horio, T. EMG Activities of Facial and Chewing Muscles of Human Adults in Response to Taste  
642 Stimuli. *Percept. Mot. Skills* **97**, 289–298 (2003).

- 643 42. Smith, K. S. & Berridge, K. C. Opioid Limbic Circuit for Reward: Interaction between Hedonic  
644 Hotspots of Nucleus Accumbens and Ventral Pallidum. *J. Neurosci.* **27**, 1594–1605 (2007).
- 645 43. Heller, A. S., Greischar, L. L., Honor, A., Anderle, M. J. & Davidson, R. J. Simultaneous acquisition  
646 of corrugator electromyography and functional magnetic resonance imaging: a new method for  
647 objectively measuring affect and neural activity concurrently. *NeuroImage* **58**, 930–934 (2011).
- 648 44. *The Science of Facial Expression*. (Oxford University Press, 2017).
- 649 45. Grabenhorst, F. & Rolls, E. T. Value, pleasure and choice in the ventral prefrontal cortex. *Trends*  
650 *Cogn. Sci.* **15**, 56–67 (2011).
- 651 46. Rademacher, L. *et al.* Dissociation of neural networks for anticipation and consumption of  
652 monetary and social rewards. *NeuroImage* **49**, 3276–3285 (2010).
- 653 47. Chevallier, C., Kohls, G., Troiani, V., Brodtkin, E. S. & Schultz, R. T. The social motivation theory of  
654 autism. *Trends Cogn. Sci.* **16**, 231–239 (2012).
- 655 48. Haggarty, C. J., Malinowski, P., McGlone, F. P. & Walker, S. C. Autistic traits modulate cortical  
656 responses to affective but not discriminative touch. *Eur. J. Neurosci.* **n/a**, (2019).
- 657 49. Walker, S. C. & McGlone, F. P. The social brain: neurobiological basis of affiliative behaviours and  
658 psychological well-being. *Neuropeptides* **47**, 379–393 (2013).
- 659 50. Fischer, A. G. & Ullsperger, M. An Update on the Role of Serotonin and its Interplay with  
660 Dopamine for Reward. *Front. Hum. Neurosci.* **11**, (2017).
- 661 51. World Medical Association. World Medical Association Declaration of Helsinki: ethical principles  
662 for medical research involving human subjects. *JAMA* **310**, 2191–2194 (2013).
- 663 52. Fridlund, A. J. & Cacioppo, J. T. Guidelines for human electromyographic research.  
664 *Psychophysiology* **23**, 567–89 (1986).
- 665 53. Bates, D., Maechler, M., Bolker, B. & Walker, S. *lme4: Linear mixed-effects models using Eigen*  
666 *and S4*. (2014).
- 667 54. R Core Team. *R: A language and environment for statistical computing*. (R Foundation for  
668 Statistical Computing, 2019).

- 669 55. Judd, C. M., Westfall, J. & Kenny, D. A. Treating stimuli as a random factor in social psychology: A  
670 new and comprehensive solution to a pervasive but largely ignored problem. *J. Pers. Soc.*  
671 *Psychol.* **103**, 54–69 (2012).
- 672 56. Delorme, A. & Makeig, S. EEGLAB: an open source toolbox for analysis of single-trial EEG  
673 dynamics including independent component analysis. *J. Neurosci. Methods* **134**, 9–21 (2004).  
674  
675

### **Supporting Information:**

1. Description of all elements in a trial (and Fig. S1)
2. Full statistical results



## 1. Description of all elements in a trial

Each trial included (Fig. S1) the following steps: 1) a fixation cross (2 sec), 2) a picture announcing the highest possible reward (high or low, 3 sec), 3) a continuous scale ranging from ‘not at all’ to ‘very much’ to rate (without time limit) wanting of the announced reward (ratings were converted to a 20-point Likert scale), 4) a 2-sec period announcing the effort phase, 5) a 4-sec period of physical effort, during which participants could set the chances of receiving the announced reward by the amount of force they would exert by squeezing the dynamometer with their right hand while receiving visual feedback of the amount of exerted force (sliding average of 1 sec, as percentage of the MVC), 6) a picture announcing the obtained reward (3 sec), which could be high, low, or verylow (the greater participants’ effort, the higher the probability of obtaining the announced reward), 7) a phase of preparation for reward delivery (3 sec in the food, 7.3 sec in the touch condition), 8) a phase of reward delivery (2 sec in the food, 6.5 sec in the touch condition – this difference in timing was necessary to obtain sufficiently long tactile stimulation, while keeping the overall trial duration similar across conditions), and only in the food condition also instructions to slightly lean back and swallow the obtained reward (duration 3 sec), 9) a relaxation phase (5 sec), and 10) a continuous scale ranging from negative to positive to rate the liking of the obtained reward. In the food condition, participants then received water for mouth rinsing, in a way similar to how they had received the food reward. In both conditions trials ended with a blank screen for 3 to 4 seconds.

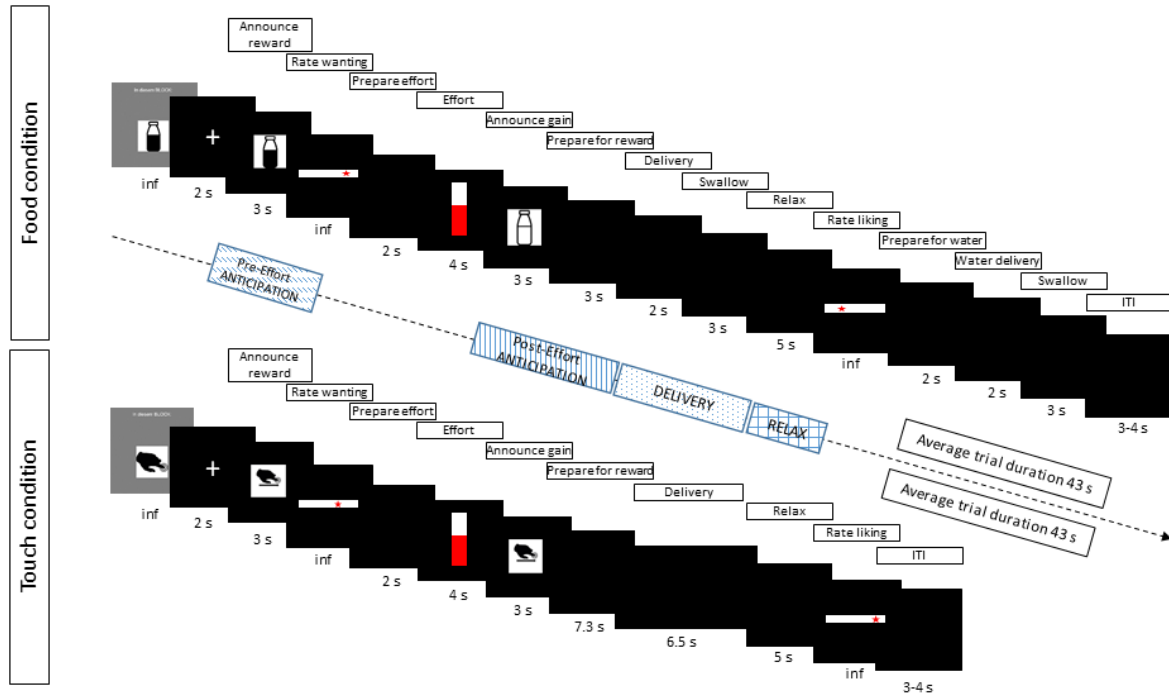

Fig. S1: Trial examples for the food and touch conditions, including all screens.

## 2. Full statistical results

### Explicit measures of Social and Nonsocial reward: wanting, liking and effort

The number of trials with high, low, or verylow rewards did not differ across groups, as shown by a linear mixed effects model (LMM) with number of trials as dependent variable, the fixed effects Condition (food, touch), Drug (amisulpride, naltrexone, placebo), and RewardType (high, low, verylow), and by-subject random intercepts. Only a significant main effect of Reward Type was found ( $F(2, 763) = 27.84, p < .001$ ), due to a greater number of high ( $M = 16.53, SD = 2.87$ ) than low ( $M = 14.93, SD = 3.46$ ) and verylow ( $M = 8.67, SD = 4.93$ ) trials across all three groups.

Moreover, groups of participants did not differ in their maximum voluntary contraction (MVC) of the hand dynamometer, which was measured right before the main task ( $\beta = 1.6, SE = 8.68, t = 0.19, p = 0.85$ ), nor in their positive and negative mood measured with the PANAS at time of pill intake or three hours later (all  $\beta < 0.6$ , all  $t < 0.8$ , all  $p > 0.4$ ).

Subjective ratings of wanting and liking, and effort, were analyzed in separate linear mixed effects models (LMMs) with Condition (food, touch), Drug (amisulpride, naltrexone, placebo), and RewardType (high, low announced at the beginning of each trial for wanting and effort; high, low, verylow obtained after the effort phase for liking) as fixed effects, and as random effects intercepts for subjects and by-subject random slopes for the effects of Condition, RewardType, and their interaction.

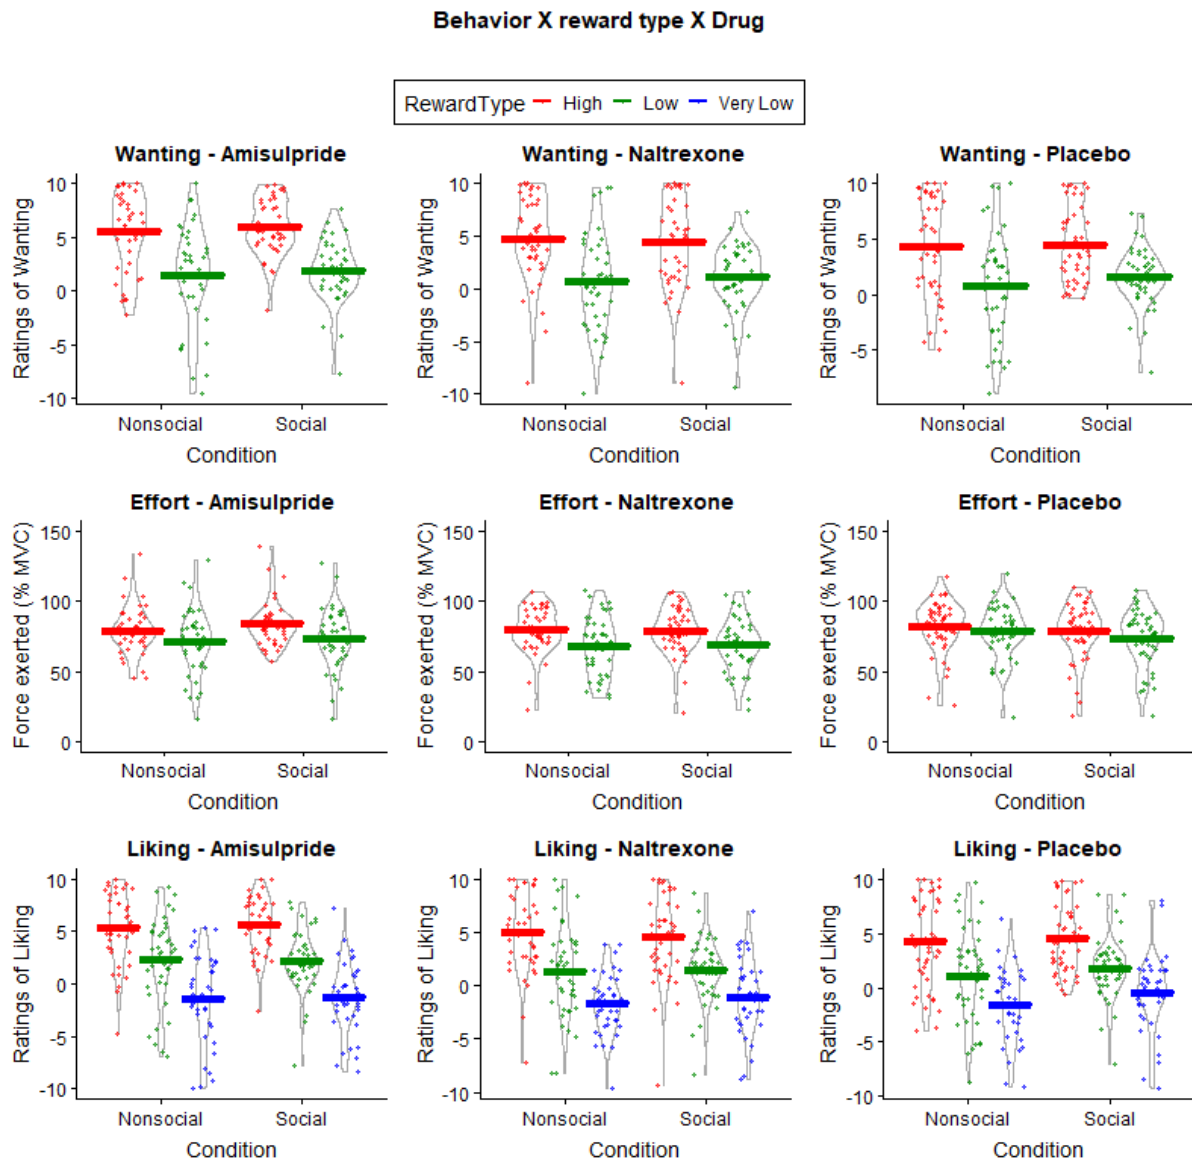

Fig. S2: Violin plots depicting ratings of wanting (top row), physical effort (middle row), and ratings of liking (bottom row) for nonsocial (food) and social (touch) rewards, divided by drug group. Ratings of wanting and liking were recorded on Likert scales ranging from -10 ('not at all') to +10 ('very much'). Exerted force is the maximum value (as percentage of the MVC) reached in a 4-sec period. These measures are shown as a function of RewardType, i.e. the individual preferences of three social and three nonsocial stimuli, measured at the beginning of the experiment. Each data point corresponds to the mean per participant, horizontal lines show means over all participants, outer lines represent the probability densities. The verylow rewards were never announced, and were only received after insufficient effort had been exerted – they therefore only appear in the ratings of liking.

Behavioral analyses on ratings of wanting (Fig. S2, top) resulted in an expected significant main effect of RewardType ( $F(1, 128.02) = 119.3159, p < .001$ ), due to higher

ratings of wanting for high reward ( $M = 4.89$ ,  $SD = 4.31$ ) compared to low reward ( $M = 1.14$ ,  $SD = 4.46$ ). All other effects were not significant (all  $F < 2.4$ , all  $p > .1$ ).

The same LMM on effort (Fig. 2, center) resulted in the expected significant main effect of RewardType ( $F(1, 128.49) = 54.1821$ ,  $p < .001$ ), due to stronger force applied for high ( $M = 80.49$ ,  $SD = 22.35$ ) than low rewards ( $M = 71.74$ ,  $SD = 25.42$ ); a significant Condition X Drug interaction ( $F(1, 128.31) = 4.5369$ ,  $p = .01$ ) reflecting lower effort in the food condition in the amisulpride ( $M = 74.98$ ,  $SD = 26.57$ ) and naltrexone ( $M = 73.51$ ,  $SD = 24.43$ ) groups compared to the placebo ( $M = 80.20$ ,  $SD = 22.41$ ) group, but similar force across drug groups in the Social condition (amisulpride:  $M = 78.34$ ,  $SD = 25.14$ ; naltrexone:  $M = 73.78$ ,  $SD = 23.15$ ; placebo:  $M = 76.11$ ,  $SD = 23.51$ ). A marginally significant RewardType X Drug interaction was also found ( $F(1, 128.50) = 2.9734$ ,  $p = .055$ ), due to reduced effort to low rewards in the amisulpride ( $M = 71.67$ ,  $SD = 27.60$ ) and naltrexone ( $M = 67.90$ ,  $SD = 24.45$ ) groups compared to the placebo group ( $M = 75.65$ ,  $SD = 23.60$ ), but no differences in effort between groups for high rewards (amisulpride:  $M = 81.60$ ,  $SD = 23.09$ ; naltrexone:  $M = 79.29$ ,  $SD = 21.70$ ; placebo:  $M = 80.63$ ,  $SD = 22.23$ ). All other effects were not significant (all  $F < 0.9$ , all  $p > .4$ ).

The same LMM on the liking ratings (Fig. 2, bottom) resulted in the expected main effect of RewardType ( $F(2, 260.22) = 116.0760$ ,  $p < .001$ ), with greatest liking of high rewards ( $M = 5.20$ ,  $SD = 3.92$ ), followed by low rewards ( $M = 2.00$ ,  $SD = 4.06$ ), and verylow rewards at the bottom ( $M = -1.26$ ,  $SD = 3.95$ ; all pairwise comparisons  $p < .001$ ). A significant Drug X RewardType interaction ( $F(4, 260.24) = 8.2899$ ,  $p < .001$ ) reflected greater liking of low rewards in the amisulpride group ( $M = 2.57$ ,  $SD = 3.78$ ) compared with both the naltrexone ( $M = 1.33$ ,  $SD = 4.35$ ,  $p = .01$ ,  $p = .01$ ) and the placebo groups ( $M = 1.53$ ,  $SD = 4.18$ ,  $p = .02$ ,  $p = .02$ ).

In summary, main effects of RewardType were found across all behavioral measures, reflecting greater wanting and liking of high compared to low rewards. The amisulpride and

naltrexone groups showed reduced effort to obtain food rewards, and to obtain low rewards of both conditions – although these effects did not survive post-hoc pairwise comparisons. The amisulpride group also showed greater liking of low rewards compared to both the naltrexone and placebo groups.

## **Implicit measures of food and touch rewards: facial EMG**

### **Pre-Effort-Anticipation**

For the CS muscle by Wanting, significant main effects of Condition ( $F(1, 128.73) = 12.0021, p < .001$ ) and Wanting ( $F(1, 164.72) = 10.6538, p = .001$ ) were found. Activation of the CS was greater for the food ( $M = 116.35, SD = 112.85$ ) than the touch ( $M = 110.21, SD = 81.59$ ) condition and decreased, as expected, with increasing ratings of wanting ( $b = -6.5$ ). A significant Drug X Condition interaction ( $F(2, 128.70) = 4.8080, p = .009$ ) reflected greater CS activation in to food than touch in the amisulpride group ( $p = .004$ ; food:  $M = 119.12, SD = 134.43$ ; touch:  $M = 109.46, SD = 76.09$ ) and naltrexone group ( $p < .001$ ; food:  $M = 120.00, SD = 128.19$ ; touch:  $M = 109.66, SD = 89.46$ ), while the placebo group had similar activations across both conditions ( $p = .68$ ; food:  $M = 110.30, SD = 65.72$ ; touch:  $M = 111.44, SD = 78.17$ ). All other effects were not significant (all  $F < 2.2$ , all  $p > .1$ ). CS activation in the food condition was also significantly greater in the naltrexone than placebo group ( $p = .04$ ).

For the CS muscle by Effort, in addition to the aforementioned effects of Condition and Drug X Condition, a significant main effect of Effort was found ( $F(1, 148.37) = 10.0506, p = .002$ ), due to CS relaxation with increasing levels of Effort ( $b = -6.04$ ).

For the ZM muscle by Wanting, a significant main effect of Condition ( $F(1, 128.12) = 13.9723, p < .001$ ) was also found, reflecting greater ZM activation for food ( $M = 138.79, SD = 185.47$ ) than touch ( $M = 122.98, SD = 168.20$ ) rewards. Moreover, a significant Condition X Wanting interaction ( $F(1, 122.00) = 6.0828, p = .02$ ) reflected increased ZM activation with increasing ratings of Wanting in the food ( $b = 5.25, p = .02$ ) but not in the Touch condition ( $b = -3.81, p = .34$ ). All other effects were not significant (all  $F < .7$ , all  $p > .54$ ).

For the ZM muscle by Effort (random slopes for the Condition X Effort interaction were removed to allow model convergence), only a significant main effect of Condition was found ( $F(1, 127.4) = 14.6601, p < .001$ ), with greater ZM activation during food ( $M = 138.79, SD = 185.47$ ) compared to touch ( $M = 122.98, SD = 168.20$ ) trials.

In summary, activation of the CS in the Pre-Effort anticipation period was inversely related to Wanting and Effort, and was increased for food compared to touch stimuli in both active drug groups, but not in the placebo group. In the food condition, greater ZM activation for increasing Wanting was also found.

### **Post-Effort anticipation**

No significant effects were found for the CS muscle, neither by Wanting, nor by Effort (all  $F < 2.3$ , all  $p > .1$ ).

For the Zygomaticus, only a significant main effect of Wanting was found ( $F(1, 130.33) = 6.5565, p = .01$ ), due to greater ZM contraction for increasing levels of Wanting ( $b = -6.67$ ).

### **Reward Delivery**

Analysis of the CS resulted in a significant main effect of Condition ( $F(1, 125.16) = 5.7899, p = .02$ ), due to greater muscle activation in the food ( $M = 150.44, SD = 202.56$ ) than touch condition ( $M = 116.79, SD = 395.75$ ), and in a trend for a main effect of Liking ( $F(1, 113.08) = 3.2671, p = .07$ ).

For the ZM a significant main effect of Condition ( $F(1, 126.79) = 74.5420, p < .001$ ), as well as a significant Liking X Drug interaction ( $F(2, 125.21) = 3.2858, p = .04$ ) were found. In the placebo group, the slope for ZM activation for greater liking was significantly steeper than for the naltrexone group ( $p = .03$ ). No difference between placebo and amisulpride and between amisulpride and naltrexone groups emerged (all  $p > .3$ ).

## Relax phase

For the CS by Liking (only the random slope for Liking was included to allow model convergence), significant main effects of Condition ( $F(1, 22925.6) = 132.9776, p < .001$ ) and Liking ( $F(1, 128.6) = 15.3266, p < .001$ ), and significant Condition X Liking ( $F(1, 16300.1) = 6.3334, p = .01$ ) and Condition X Drug ( $F(1, 22902.1) = 3.7972, p = .02$ ) interactions were found. The Condition X Liking interaction was due to the fact that while CS activation decreased with greater liking in general ( $b = -16.8$ ), this effect was stronger in the Food than the Touch condition ( $p = .04$ ). The Condition X Drug interaction was due to greater CS activation to food rewards in the naltrexone group ( $M = 161.22, SD = 479.78$ ) than in the amisulpride ( $M = 132.93, SD = 191.94; p = .04$ ) and placebo ( $M = 134.36, SD = 138.97; p = .05$ ) groups. CS activations did not differ between groups in the touch condition (all  $p > .6$ ).

For the ZM, only a significant main effect of Condition was found ( $F(1, 127.17) = 127.5590, p < .001$ ), reflecting greater ZM contraction in the food ( $M = 211.18, SD = 218.25$ ) than in the touch ( $M = 133.32, SD = 289.47$ ) condition.
